# Supplementary material for: Multiplex Detection of Different Magnetic Beads Using Frequency Scanning in Magnetic Frequency Mixing Technique
Source: MDPI journal article supplement (doi:10.3390/s19112599), 2019-06-07
Supplement: s1 [file s1]

# Multiplex Detection of Different Magnetic Beads Using Frequency Scanning in Magnetic Frequency Mixing Technique

Stefan Achtsnicht <sup>1,2</sup>, Ali Mohammad Pourshahidi <sup>1,2</sup>, Andreas Offenhäusser <sup>1,2</sup> and Hans-Joachim Krause <sup>1,\*</sup>

<sup>1</sup> Institute of Complex Systems Bioelectronics (ICS-8), Forschungszentrum Jülich, 52425 Jülich, Germany; s.achtsnicht@fz-juelich.de (S.A.); a.pourshahidi@fz-juelich.de (A.M.P.); a.offenhausen@fz-juelich.de (A.O.)

<sup>2</sup> RWTH Aachen University, 52062 Aachen, Germany;

\* Correspondence: h.-j.krause@fz-juelich.de; Tel.: +49-2461-61-2955

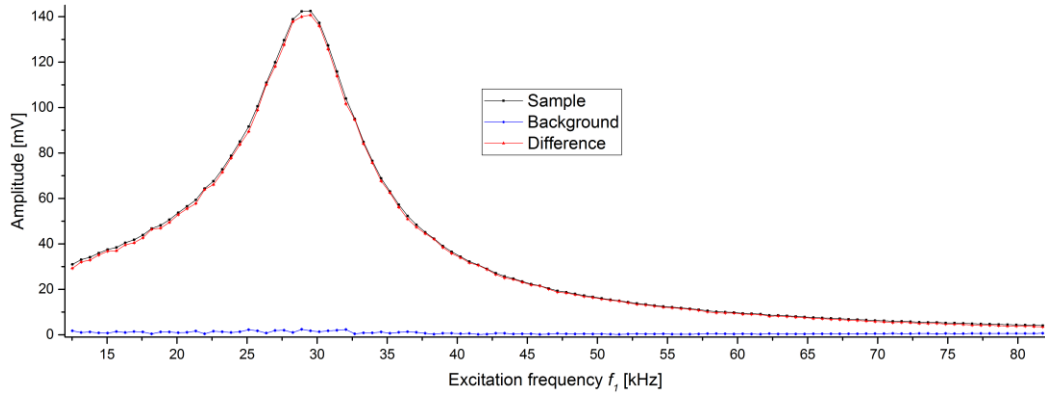

**Figure 1.** Measured amplitude as a function of excitation frequency  $f_i$  of 1 $\mu$ mSynomagD fixed in 3D immunofiltration columns, background scan and difference.
